# Supplementary material for: Protein acidification and hydrolysis by pepsin ensure efficient trypsin-catalyzed hydrolysis
Source: Royal Society of Chemistry journal article supplement (doi:10.1039/d1fo00413a), 2021-01-01
Supplement: d1fo00413a1.pdf [file d1fo00413a1.pdf]

## Supplementary material

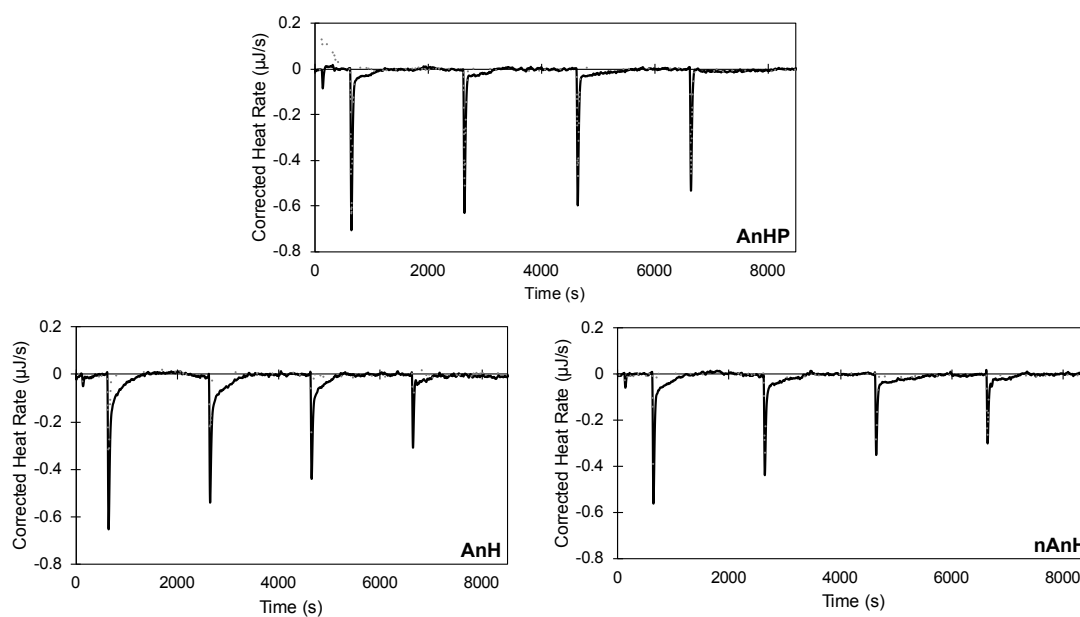

**S 1.** Continuous injection assay. Exemplar of calorimetric rate measurements of the blank injection of 100  $\mu\text{M}$  substrate into phosphate buffer (dotted line) and reaction injection of substrate into 2.5  $\mu\text{M}$  trypsin (solid line). A small volume was injected after the initial equilibration to account for the diffusion of substrate solution from the syringe into the cell. Acidified, non-hydrolysed with inactive pepsin (AnHP), acidified, non-hydrolysed (AnH) and non-acidified, non-hydrolysed (nAnH),

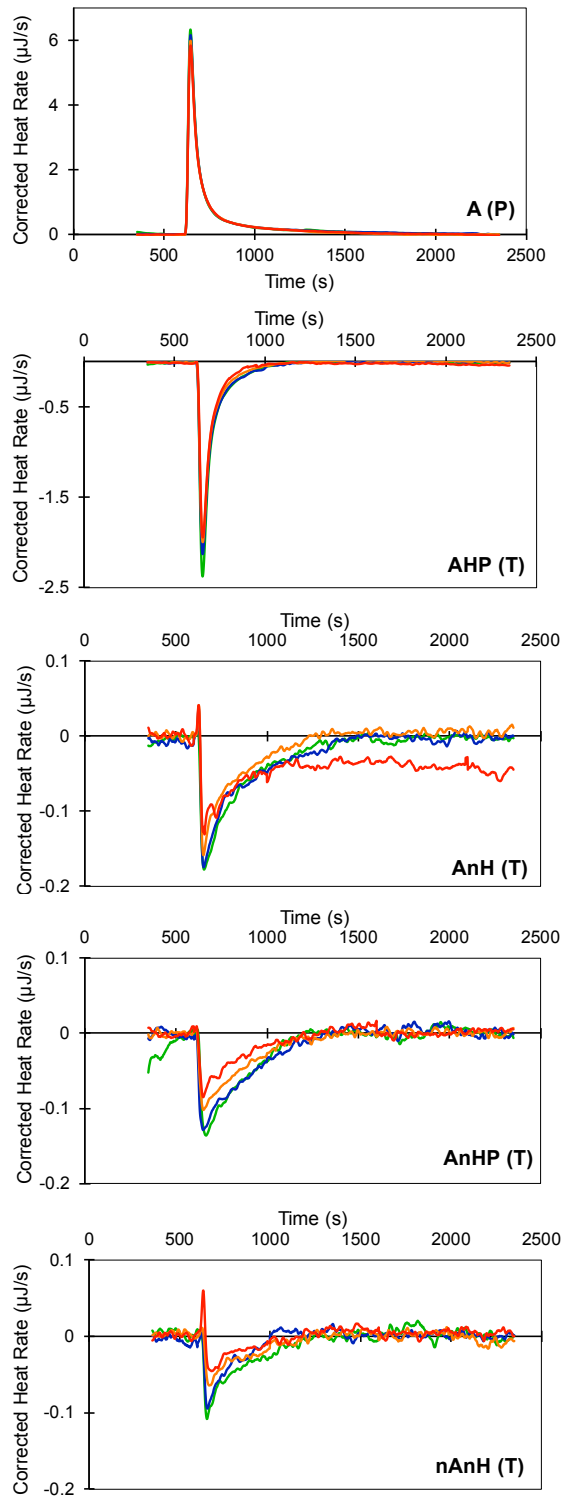

**S 2.** Superimposed heat rates from the continuous injection assay BSA at pH 2 (A) injected to a pepsin solution. BSA pepsin-hydrolysate (AHP), acidified, non-hydrolysed with inactive pepsin (AnHP), acidified, non-hydrolysed (AnH) and non-acidified, non-hydrolysed (nAnH), injected into a trypsin solution at pH 8. (1<sup>st</sup> injection green, 2<sup>nd</sup> blue, 3<sup>rd</sup> orange, 4<sup>th</sup> red).

Just as in the continuous injection assay, the higher amount of substrate that is injected results in a higher signal intensity of heat rate, this is the case of BSA injected into pepsin and the pepsin-hydrolysate into trypsin (S 3). Contrarily, the lower amount of cleavage sites for trypsin in the intact proteins result in a low signal intensity, in such cases the instrument drift is more noticeable than for larger signal intensities <sup>1</sup>. This might explain the greater error associated to the rate estimates at high substrate concentration of trypsin-catalysed hydrolysis of intact protein, especially when it has not been previously acidified (Figure 5).

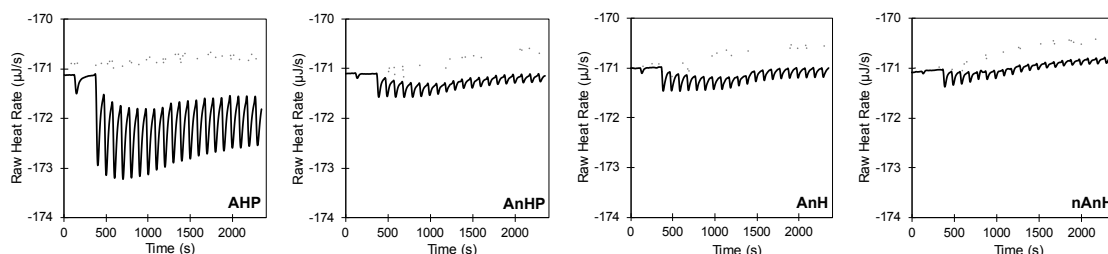

**S 3.** Multiple injection assay of trypsin-catalysed hydrolysis at pH 8. Exemplar of calorimetric rate measurements of the blank injection of 100 µM substrate into phosphate buffer (dotted line) and reaction injection of substrate into 2.5 µM trypsin (solid line). BSA pepsin-hydrolysate (AHP), acidified, non-hydrolysed with inactive pepsin (AnHP), acidified, non-hydrolysed (AnH) and non-acidified, non-hydrolysed (nAnH). A small volume was injected after the initial equilibration to account for the diffusion of substrate solution from the syringe into the cell.

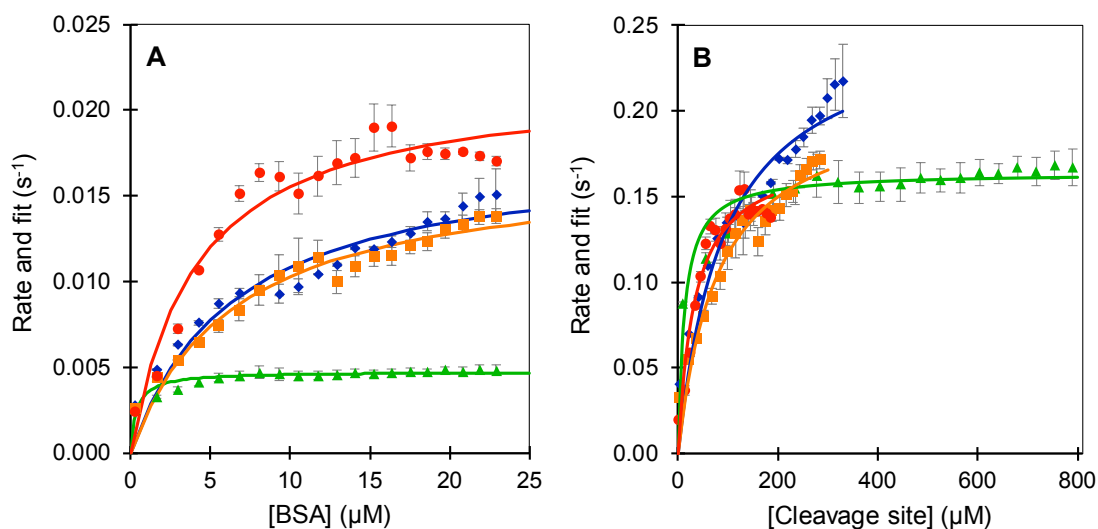

**S 4.** Reaction rate of trypsin-catalysed hydrolysis at pH 8 of BSA pepsin-hydrolysate (triangle), acidified, non-hydrolysed BSA with inactive pepsin (diamond), acidified, non-hydrolysed BSA (square) and non-acidified, non-hydrolysed BSA (circle). Error bars represent standard deviation from three replicate estimations. Fit to the Michaelis Menten model (line). Protein (A) and cleavage sites (B) considered as substrates, rates estimated from the appropriate  $\Delta H_{app}$  (kJ/ mol BSA or kJ/ mol cleavage sites).

## Kinetic parameters of pepsin and trypsin-catalysed hydrolysis of peptide bonds

**S 5.** Kinetic parameters of pepsin-catalysed hydrolysis of small synthetic peptides and derivatives at pH 2 – 2.2. Selected, representative values from the references are included. Parameters are ranked according to their specificity constant ( $k_{\text{cat}}/k_{\text{m}}$ ). Parameters estimated in this study for BSA are highlighted.

| Substrate                              | $K_{\text{m}}$ (mM) | $k_{\text{cat}}$ ( $\text{s}^{-1}$ ) | $k_{\text{cat}}/K_{\text{m}}$<br>( $1/\text{s mM}$ ) | Reference |
|----------------------------------------|---------------------|--------------------------------------|------------------------------------------------------|-----------|
| Ac-F-FNH <sub>2</sub>                  | -                   | -                                    | 0.02                                                 | 2         |
| Ac-F-Y(NO <sub>2</sub> ) <sub>2</sub>  | 0.50                | 0.011                                | 0.02                                                 | 3         |
| Ac-F-Y-OEt                             | 0.94                | 0.021                                | 0.02                                                 | 4         |
| Ac-F-F                                 | 1.40                | 0.04                                 | 0.03                                                 | 3         |
| Ac-Y(NO <sub>2</sub> ) <sub>2</sub> -F | 0.41                | 0.06                                 | 0.13                                                 | 3         |
| Z-F-F-G-OMe3P                          | 0.80                | 0.18                                 | 0.23                                                 | 5         |
| Ac-F-F-G                               | 1.7                 | 0.39                                 | 0.23                                                 | 3         |
| BSA A                                  | 0.78                | 0.23                                 | 0.30                                                 |           |
| Z-H-F-F-OEt                            | 0.33                | 0.11                                 | 0.33                                                 | 4         |
| Z-F-F-OP4P                             | 0.71                | 0.49                                 | 0.69                                                 | 5         |
| Z-F(NO <sub>2</sub> )-F-OP4P           | 0.50                | 0.69                                 | 1.4                                                  | 5         |
| Z-G-G-F(NO <sub>2</sub> )-F-OP4P       | 1.10                | 8.1                                  | 7.4                                                  | 5         |
| BSA                                    | 0.200               | 4.44                                 | 22.1                                                 | 6         |
| Z-G-G-F-F-OP4P                         | 0.80                | 56.5                                 | 70.6                                                 | 5         |

**S 6.** Kinetic parameters of trypsin-catalysed hydrolysis of small synthetic peptides and amino acid derivatives at pH 8. Selected, representative values from the references are included. Parameters are ranked according to their specificity constant ( $k_{\text{cat}}/K_m$ ). Substrates of deamidation are presented in italics. Parameters estimated in this study for BSA are highlighted.

| Substrate                 | $K_m$ (mM) | $k_{\text{cat}}$ ( $\text{s}^{-1}$ ) | $k_{\text{cat}}/K_m$ ( $1/\text{s mM}$ ) | Reference |
|---------------------------|------------|--------------------------------------|------------------------------------------|-----------|
| <i>Z-R-V-L-Nan</i>        | 0.20       | 0.001                                | 0.005                                    | 7         |
| <i>R-V-L-Nan</i>          | 0.10       | 0.007                                | 0.070                                    | 7         |
| <i>BACA</i>               | 4.30       | 0.33                                 | 0.077                                    | 8         |
| Ac-R-V-OMe                | 6.69       | 2.2                                  | 0.33                                     | 9         |
| <i>BLA</i>                | 4.60       | 1.9                                  | 0.4                                      | 8         |
| <i>BANA</i>               | 0.14       | 0.08                                 | 0.6                                      | 10        |
| H-G-P-R-V-OH              | 1.20       | 1.2                                  | 1.0                                      | 9         |
| <i>BAA</i>                | 2.50       | 2.8                                  | 1.1                                      | 8         |
| Ac-R-G-OEt                | 3.00       | 4.2                                  | 1.4                                      | 9         |
| BSA AnHP                  | 0.08       | 0.21                                 | 2.6                                      |           |
| BSA AnH                   | 0.09       | 0.26                                 | 2.9                                      |           |
| M-R-F-A                   | 1.90       | 7.1                                  | 3.7                                      | 11        |
| BSA nAnH                  | 0.03       | 0.18                                 | 5.4                                      |           |
| Ac-G-R-V-OMe              | 20.00      | 3.6                                  | 0.2                                      | 9         |
| Ac-G-G-R-G-OEt            | 2.90       | 19.0                                 | 6.6                                      | 9         |
| Ac-V-R-G-P-R-OH           | 0.37       | 4.2                                  | 11.4                                     | 9         |
| F-M-R-F(NH <sub>2</sub> ) | 5.90       | 69.0                                 | 11.7                                     | 11        |
| BSA AHP                   | 0.01       | 0.16                                 | 12.5                                     |           |
| Ac-E-G-G-G-G-R-G-OEt      | 0.34       | 5.6                                  | 16.5                                     | 9         |
| F-R-S-V                   | 4.80       | 99.2                                 | 20.7                                     | 11        |
| Bz-V-L-K-Nan              | 0.40       | 8.99                                 | 22.5                                     | 7         |
| Ac-G-P-R-V-OEt            | 4.70       | 290.0                                | 61.7                                     | 9         |
| Ac-P-R-V-OMe              | 1.50       | 200.0                                | 133.3                                    | 9         |
| <i>Bz-F-F-R-Nan</i>       | 0.06       | 12.8                                 | 198.4                                    | 7         |
| Ac-E-V-R-G-OMe            | 1.30       | 290.0                                | 223.1                                    | 9         |
| <i>Bz-F-T-R-Nan</i>       | 0.05       | 24.8                                 | 488.6                                    | 7         |
| <i>I-P-R-Nan</i>          | 0.01       | 69.8                                 | 4976.7                                   | 7         |

Ac, Acetyl; BAA, N $\alpha$ -Benzoyl-L-argininamide; BACA, N $\alpha$ -benzoyl-S-2-aminoethyl-L-cysteinamide; BANA, N $\alpha$ -Benzoyl-DL-arginine  $\beta$ -naphthylamide; BLA, N $\alpha$ -benzoyl-L-lysineamide; Bz, benzoyl; Nan, p-nitroanilide; OP4P, 3-(4-pyridyl)propyl-1-oxy; P, pyridyl; Z, benzyloxycarbonyl.

## References

1. L. D. Hansen, M. K. Transtrum, C. Quinn and N. Demarse, Enzyme-catalyzed and binding reaction kinetics determined by titration calorimetry, *Biochimica et Biophysica Acta (BBA) - General Subjects*, 2016, **1860**, 957-966.
2. A. J. Cornish-Bowden and J. Knowles, The pH-dependence of pepsin-catalysed reactions, *Biochemical Journal*, 1969, **113**, 353-362.
3. A. Cornish-Bowden, P. Greenwell and J. Knowles, The rate-determining step in pepsin-catalysed reactions, and evidence against an acyl-enzyme intermediate, *Biochemical Journal*, 1969, **113**, 369-375.
4. T. R. Hollands and J. S. Fruton, Kinetics of the hydrolysis of synthetic substrates by pepsin and by acetyl-pepsin, *Biochemistry*, 1968, **7**, 2045-2053.
5. G. P. Sachdev and J. S. Fruton, Pyridyl esters of peptides as synthetic substrates of pepsin, *Biochemistry*, 1969, **8**, 4231-4238.
6. Q. Luo, D. Chen, R. M. Boom and A. E. M. Janssen, Revisiting the enzymatic kinetics of pepsin using isothermal titration calorimetry, *Food Chemistry*, 2018, **268**, 94-100.

7. M. Pozsgay, G. Cs. Szabó, P. Elödi, R. Gáspár, S. Bajusz and R. Simonsson, Investigation of the Substrate-Binding Site of Trypsin by the Aid of Tripeptidyl-p-nitroanilide Substrates, *European Journal of Biochemistry*, 1981, **115**, 497-502.
8. S.-S. Wang and F. H. Carpenter, Kinetic Studies at High pH of the Trypsin-catalyzed Hydrolysis of N $\alpha$ -Benzoyl Derivatives of L-Arginamide, L-Lysinamide, and S-2-Aminoethyl-L-cysteinamide and Related Compounds, *Journal of Biological Chemistry*, 1968, **243**, 3702-3710.
9. A. P. Lobo, J. D. Wos, M. Y. Sherman and W. B. Lawson, Active site studies of human thrombin and bovine trypsin: peptide substrates, *Archives of Biochemistry and Biophysics*, 1976, **177**, 235-244.
10. K. Maximova and J. Trylska, Kinetics of trypsin-catalyzed hydrolysis determined by isothermal titration calorimetry, *Analytical Biochemistry*, 2015, **486**, 24-34.
11. R. M. Caprioli and L. Smith, Determination of  $K_m$  and  $V_{max}$  for tryptic peptide hydrolysis using fast atom bombardment mass spectrometry, *Analytical Chemistry*, 1986, **58**, 1080-1083.
